# Supplementary material
Source: PubMed Central journal article supplement (PMC3993673)
Supplement: JCM.02954-13_zjm999093301so1.pdf [file JCM.02954-13_zjm999093301so1.pdf]

# Figure S1

## A

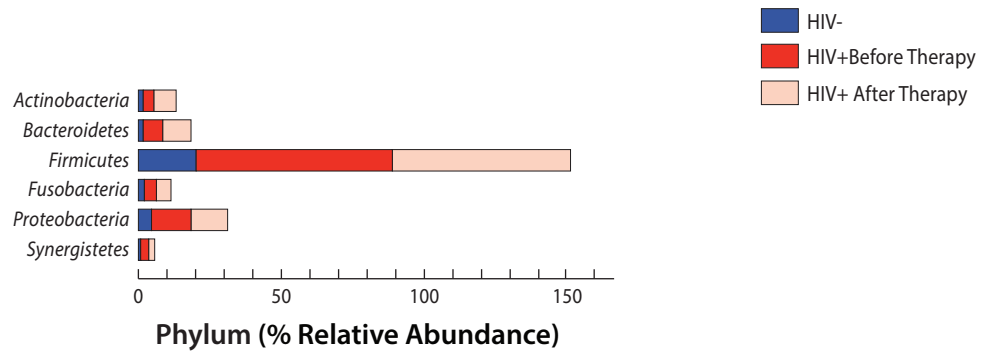

## B

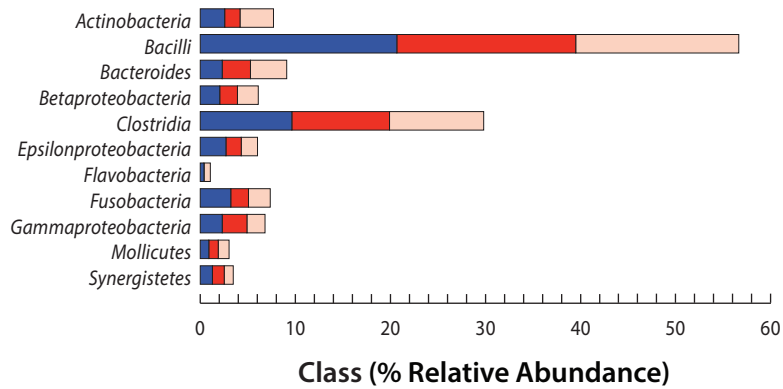

## C

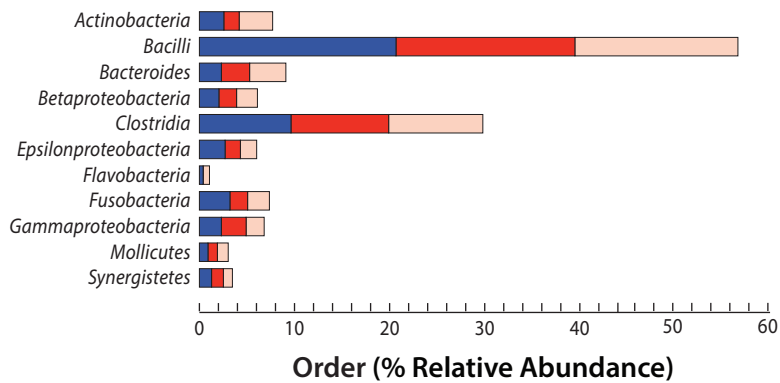

# Figure S1

## D

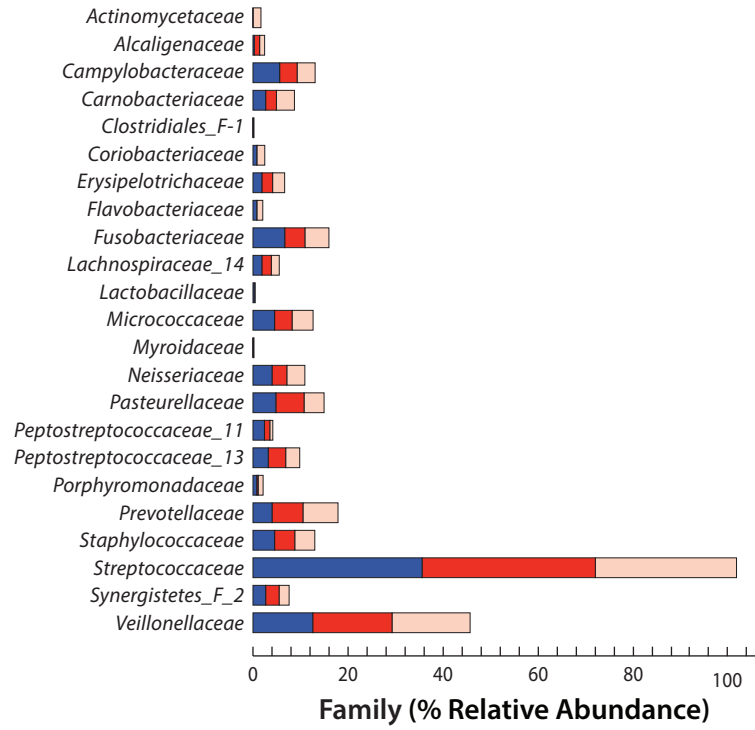

## E

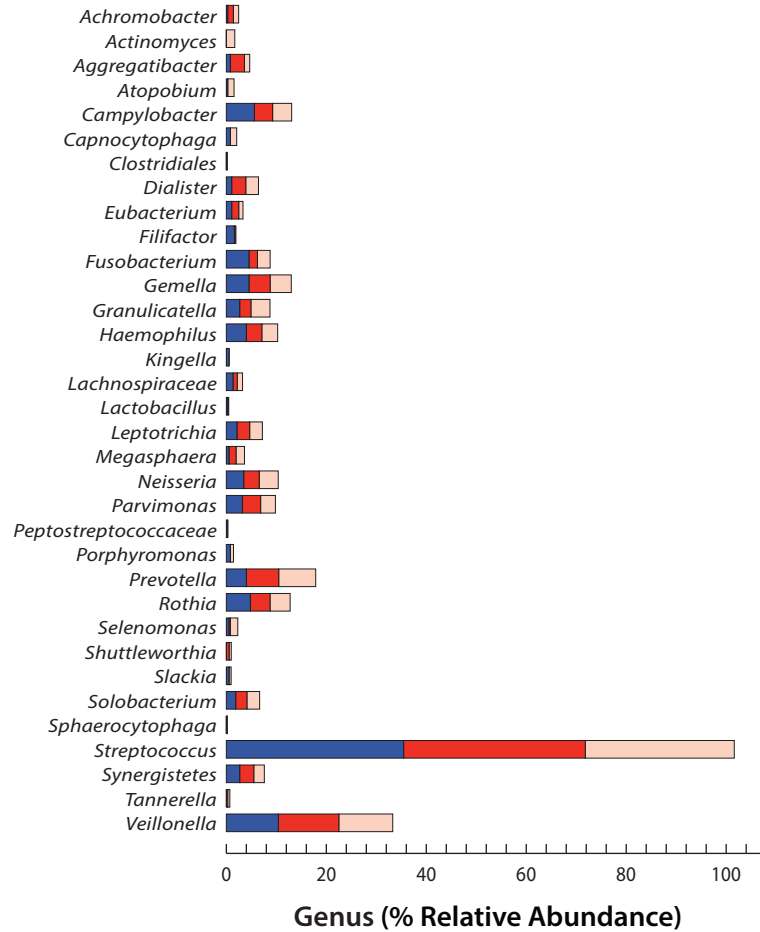

# Figure S1

F

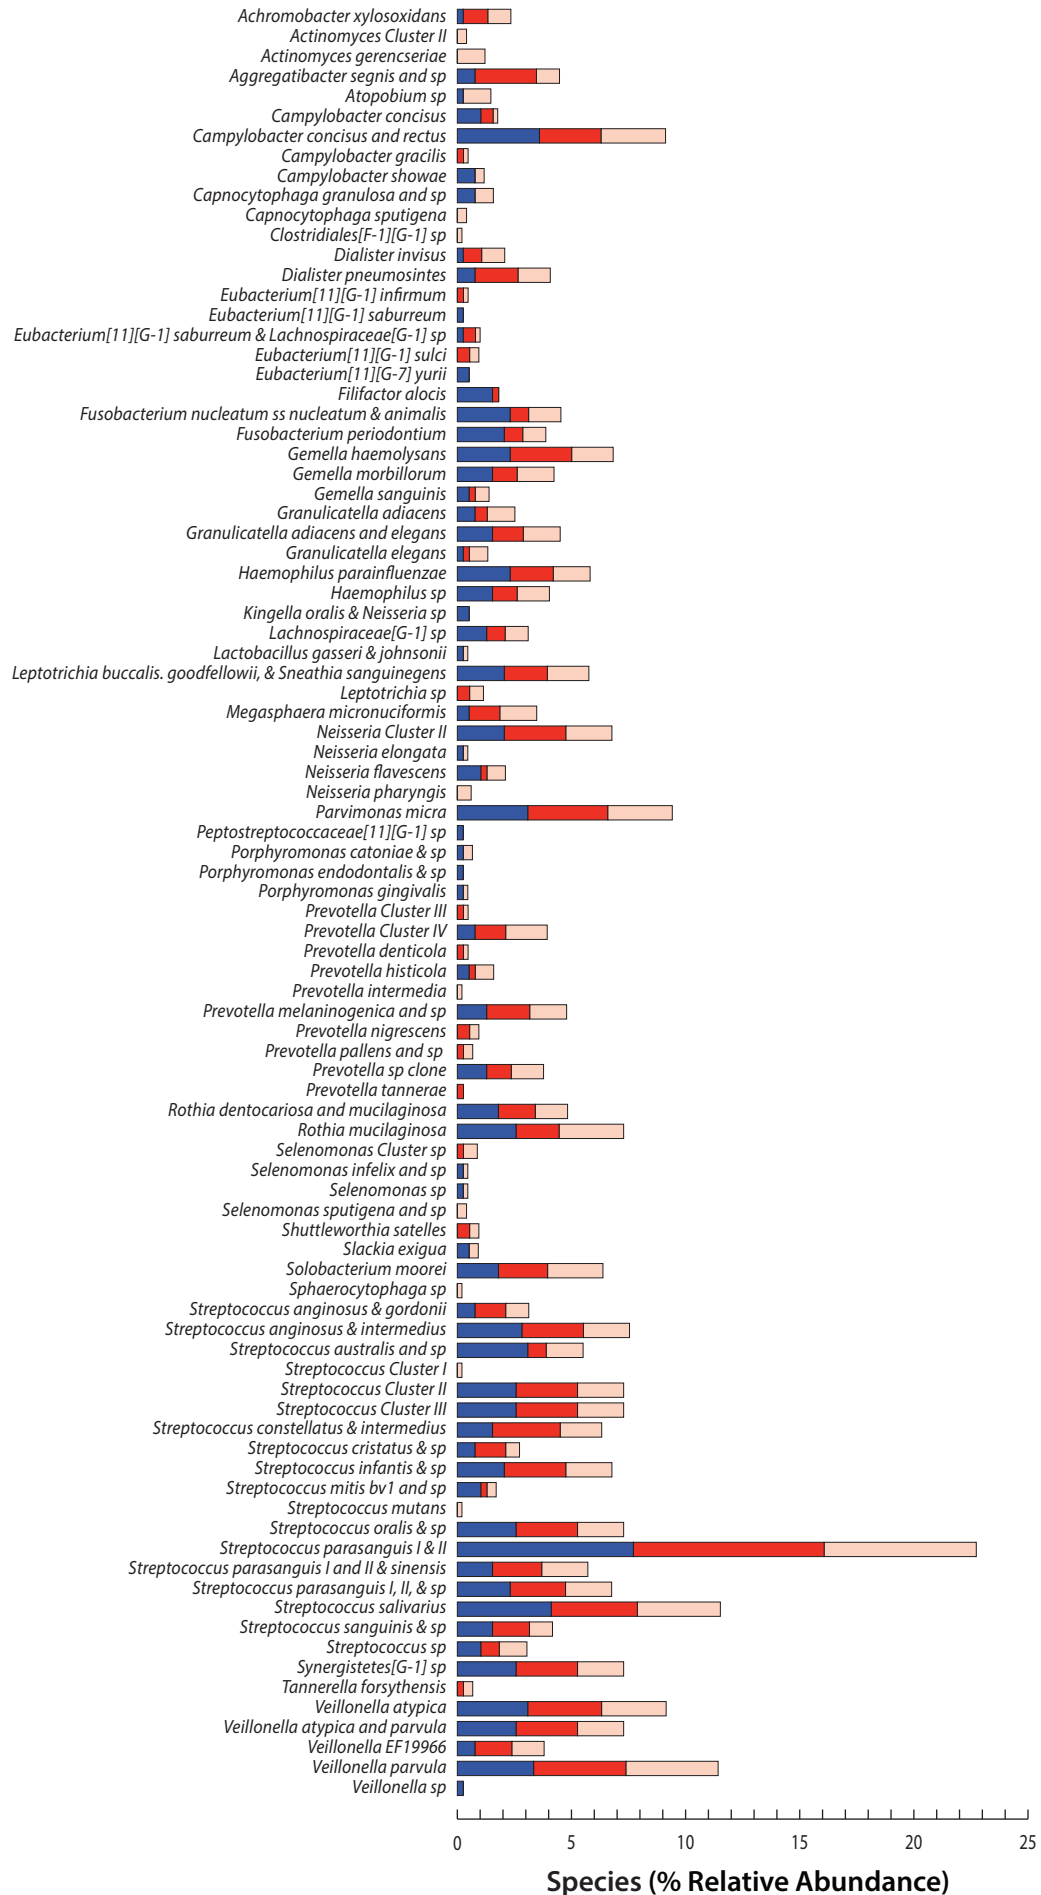

**FIG S1** Human oral microbe identification microarray (HOMIM) assay of salivary microbial flora profiles in subjects who were HIV seropositive or HIV seronegative. Among the 423 bacterial probes incorporated in the DNA microarray, 121 (29%) were detected with positive hybridization, including (A) 6 bacterial phyla, (B) 11 classes, (C) 14 orders, (D) 23 families, (E) 34 genera, and (F) 90 species.
